# Supplementary material for: Unexpectedly Long Lifetime of the Excited State of Benzothiadiazole Derivative and Its Adducts with Lewis Acids
Source: MDPI journal article supplement (doi:10.3390/molecules26072030), 2021-04-02

# checkCIF/PLATON report

Structure factors have been supplied for datablock(s) rk47

THIS REPORT IS FOR GUIDANCE ONLY. IF USED AS PART OF A REVIEW PROCEDURE FOR PUBLICATION, IT SHOULD NOT REPLACE THE EXPERTISE OF AN EXPERIENCED CRYSTALLOGRAPHIC REFEREE.

No syntax errors found.      CIF dictionary      Interpreting this report

## Datablock: rk47

---

|                 |                           |                                  |
|-----------------|---------------------------|----------------------------------|
| Bond precision: | C-C = 0.0091 A            | Wavelength=0.71073               |
| Cell:           | a=11.5203(9)              | b=18.2029(16)      c=13.1842(12) |
|                 | alpha=90                  | beta=93.957(3)      gamma=90     |
| Temperature:    | 150 K                     |                                  |
|                 | Calculated                | Reported                         |
| Volume          | 2758.2(4)                 | 2758.2(4)                        |
| Space group     | P 21/c                    | P 1 21/c 1                       |
| Hall group      | -P 2ybc                   | -P 2ybc                          |
| Moiety formula  | 2(C11 H8 Br N4 S), Cl4 Zn | 2(C11 H8 Br N4 S), Cl4 Zn        |
| Sum formula     | C22 H16 Br2 Cl4 N8 S2 Zn  | C22 H16 Br2 Cl4 N8 S2 Zn         |
| Mr              | 823.54                    | 823.54                           |
| Dx,g cm-3       | 1.983                     | 1.983                            |
| Z               | 4                         | 4                                |
| Mu (mm-1)       | 4.359                     | 4.359                            |
| F000            | 1616.0                    | 1616.0                           |
| F000'           | 1618.58                   |                                  |
| h,k,lmax        | 13,21,15                  | 13,21,15                         |
| Nref            | 4560                      | 4555                             |
| Tmin,Tmax       | 0.599,0.804               | 0.575,0.745                      |
| Tmin'           | 0.515                     |                                  |

Correction method= # Reported T Limits: Tmin=0.575 Tmax=0.745  
AbsCorr = MULTI-SCAN

Data completeness= 0.999      Theta(max)= 24.437

R(reflections)= 0.0478( 3230)      wR2(reflections)= 0.1176( 4555)

S = 1.014      Npar= 358

---

The following ALERTS were generated. Each ALERT has the format  
**test-name\_ALERT\_alert-type\_alert-level.**  
Click on the hyperlinks for more details of the test.

---

**Alert level C**

THETM01\_ALERT\_3\_C The value of  $\sin(\theta_{\max})/\lambda$  is less than 0.590  
Calculated  $\sin(\theta_{\max})/\lambda = 0.5821$   
PLAT213\_ALERT\_2\_C Atom C211 has ADP max/min Ratio ..... 3.6 oblate  
PLAT213\_ALERT\_2\_C Atom C217 has ADP max/min Ratio ..... 3.6 oblate  
PLAT213\_ALERT\_2\_C Atom C219 has ADP max/min Ratio ..... 3.4 prolat  
PLAT341\_ALERT\_3\_C Low Bond Precision on C-C Bonds ..... 0.0091 Ang.  
PLAT431\_ALERT\_2\_C Short Inter HL..A Contact Cl2 ..S22 . 3.27 Ang.  
1-x,1-y,1-z = 3\_666 Check  
PLAT911\_ALERT\_3\_C Missing FCF Refl Between Thmin & STh/L= 0.582 6 Report

---

**Alert level G**

PLAT002\_ALERT\_2\_G Number of Distance or Angle Restraints on AtSite 4 Note  
PLAT003\_ALERT\_2\_G Number of Uiso or Uij Restrained non-H Atoms ... 1 Report  
PLAT007\_ALERT\_5\_G Number of Unrefined Donor-H Atoms ..... 2 Report  
PLAT083\_ALERT\_2\_G SHELXL Second Parameter in WGHT Unusually Large 5.52 Why ?  
PLAT172\_ALERT\_4\_G The CIF-Embedded .res File Contains DFIX Records 1 Report  
PLAT186\_ALERT\_4\_G The CIF-Embedded .res File Contains ISOR Records 1 Report  
PLAT794\_ALERT\_5\_G Tentative Bond Valency for Zn1 (II) . 1.96 Info  
PLAT860\_ALERT\_3\_G Number of Least-Squares Restraints ..... 8 Note  
PLAT909\_ALERT\_3\_G Percentage of  $I > 2\sigma(I)$  Data at  $\theta(\max)$  Still 49% Note  
PLAT978\_ALERT\_2\_G Number C-C Bonds with Positive Residual Density. 0 Info

---

0 **ALERT level A** = Most likely a serious problem - resolve or explain  
0 **ALERT level B** = A potentially serious problem, consider carefully  
7 **ALERT level C** = Check. Ensure it is not caused by an omission or oversight  
10 **ALERT level G** = General information/check it is not something unexpected

0 ALERT type 1 CIF construction/syntax error, inconsistent or missing data  
8 ALERT type 2 Indicator that the structure model may be wrong or deficient  
5 ALERT type 3 Indicator that the structure quality may be low  
2 ALERT type 4 Improvement, methodology, query or suggestion  
2 ALERT type 5 Informative message, check

---

---

It is advisable to attempt to resolve as many as possible of the alerts in all categories. Often the minor alerts point to easily fixed oversights, errors and omissions in your CIF or refinement strategy, so attention to these fine details can be worthwhile. In order to resolve some of the more serious problems it may be necessary to carry out additional measurements or structure refinements. However, the purpose of your study may justify the reported deviations and the more serious of these should normally be commented upon in the discussion or experimental section of a paper or in the "special\_details" fields of the CIF. checkCIF was carefully designed to identify outliers and unusual parameters, but every test has its limitations and alerts that are not important in a particular case may appear. Conversely, the absence of alerts does not guarantee there are no aspects of the results needing attention. It is up to the individual to critically assess their own results and, if necessary, seek expert advice.

### **Publication of your CIF in IUCr journals**

A basic structural check has been run on your CIF. These basic checks will be run on all CIFs submitted for publication in IUCr journals (*Acta Crystallographica*, *Journal of Applied Crystallography*, *Journal of Synchrotron Radiation*); however, if you intend to submit to *Acta Crystallographica Section C* or *E* or *IUCrData*, you should make sure that full publication checks are run on the final version of your CIF prior to submission.

### **Publication of your CIF in other journals**

Please refer to the *Notes for Authors* of the relevant journal for any special instructions relating to CIF submission.

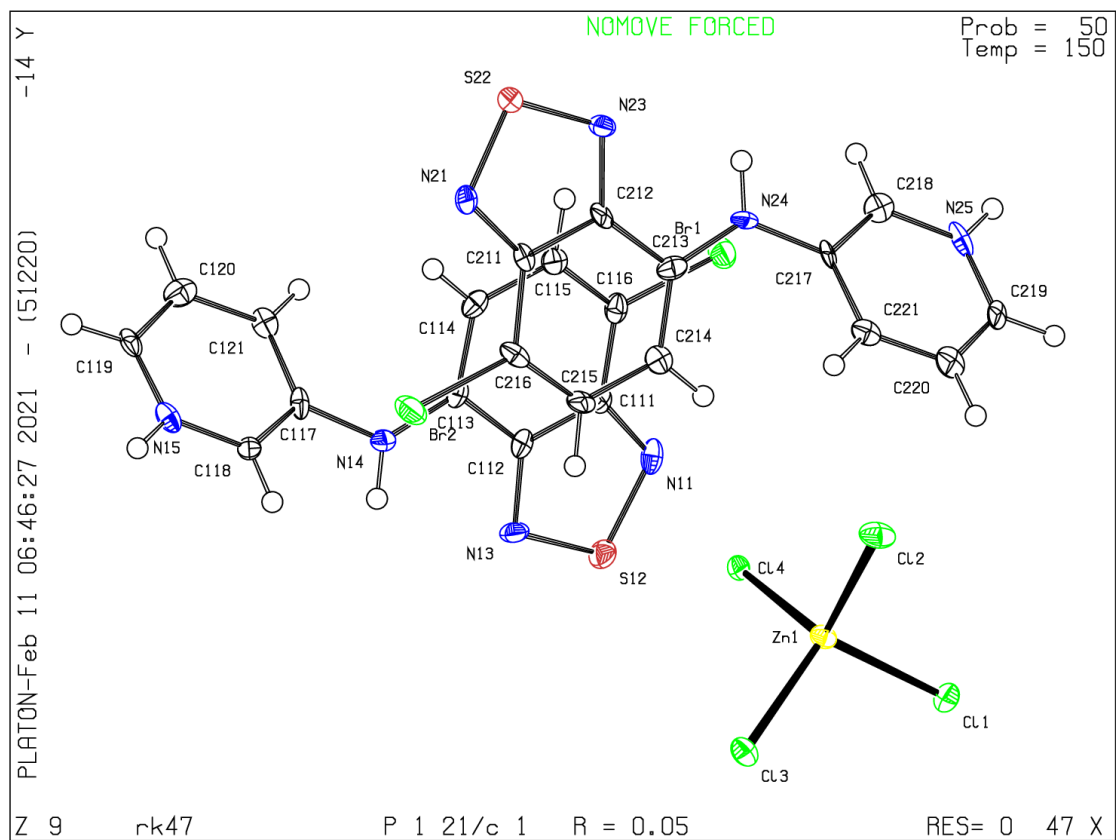

Supplement: s1 [file s1]
