# Supplementary material for: Unexpectedly Long Lifetime of the Excited State of Benzothiadiazole Derivative and Its Adducts with Lewis Acids
Source: MDPI journal article supplement (doi:10.3390/molecules26072030), 2021-04-02

# checkCIF/PLATON report

Structure factors have been supplied for datablock(s) rk61

THIS REPORT IS FOR GUIDANCE ONLY. IF USED AS PART OF A REVIEW PROCEDURE FOR PUBLICATION, IT SHOULD NOT REPLACE THE EXPERTISE OF AN EXPERIENCED CRYSTALLOGRAPHIC REFEREE.

No syntax errors found.      CIF dictionary      Interpreting this report

## Datablock: rk61

---

|                        |                                              |                                              |
|------------------------|----------------------------------------------|----------------------------------------------|
| Bond precision:        | C-C = 0.0237 Å                               | Wavelength=0.71073                           |
| Cell:                  | a=19.7043(12)                                | b=18.9722(12)      c=22.2962(17)             |
|                        | alpha=90                                     | beta=90      gamma=90                        |
| Temperature:           | 150 K                                        |                                              |
|                        | Calculated                                   | Reported                                     |
| Volume                 | 8335.1(10)                                   | 8335.1(10)                                   |
| Space group            | P n a 21                                     | P n a 21                                     |
| Hall group             | P 2c -2n                                     | P 2c -2n                                     |
| Moiety formula         | C70 H54 Br2 Cl2 Cu2 N8 O2<br>P4 S2, 3(C7 H8) | C70 H54 Br2 Cl2 Cu2 N8 O2<br>P4 S2, 3(C7 H8) |
| Sum formula            | C91 H78 Br2 Cl2 Cu2 N8 O2<br>P4 S2           | C91 H78 Br2 Cl2 Cu2 N8 O2<br>P4 S2           |
| Mr                     | 1861.42                                      | 1861.41                                      |
| Dx, g cm <sup>-3</sup> | 1.483                                        | 1.483                                        |
| Z                      | 4                                            | 4                                            |
| Mu (mm <sup>-1</sup> ) | 1.715                                        | 1.715                                        |
| F000                   | 3800.0                                       | 3800.0                                       |
| F000'                  | 3805.04                                      |                                              |
| h,k,lmax               | 22,22,25                                     | 0,0,0                                        |
| Nref                   | 13748[ 7072]                                 | 11798                                        |
| Tmin,Tmax              | 0.742,0.787                                  | 0.643,0.745                                  |
| Tmin'                  | 0.667                                        |                                              |

Correction method= # Reported T Limits: Tmin=0.643 Tmax=0.745  
AbsCorr = MULTI-SCAN

Data completeness= 1.67/0.86      Theta(max)= 24.438

R(reflections)= 0.0716( 6228)      wR2(reflections)= 0.1520( 11798)

S = 0.910      Npar= 883

---

The following ALERTS were generated. Each ALERT has the format

**test-name\_ALERT\_alert-type\_alert-level.**

Click on the hyperlinks for more details of the test.

---

**Alert level B**

PLAT341\_ALERT\_3\_B Low Bond Precision on C-C Bonds ..... 0.02374 Ang.

---

**Alert level C**

STRVA01\_ALERT\_4\_C Flack test results are ambiguous.  
From the CIF: \_refine\_ls\_abs\_structure\_Flack 0.430  
From the CIF: \_refine\_ls\_abs\_structure\_Flack\_su 0.020  
THETM01\_ALERT\_3\_C The value of sine(theta\_max)/wavelength is less than 0.590  
Calculated sin(theta\_max)/wavelength = 0.5821  
PLAT090\_ALERT\_3\_C Poor Data / Parameter Ratio (Zmax > 18) ..... 7.98 Note  
PLAT202\_ALERT\_3\_C Isotropic non-H Atoms in Anion/Solvent ..... 21 Check  
C31S C32S C33S C34S C35S C36S etc.  
PLAT213\_ALERT\_2\_C Atom C13 has ADP max/min Ratio ..... 3.1 prolat  
PLAT213\_ALERT\_2\_C Atom C51 has ADP max/min Ratio ..... 3.2 oblate  
PLAT213\_ALERT\_2\_C Atom C53 has ADP max/min Ratio ..... 3.1 prolat  
PLAT213\_ALERT\_2\_C Atom C71 has ADP max/min Ratio ..... 3.8 prolat  
PLAT220\_ALERT\_2\_C NonSolvent Resd 1 C Ueq(max)/Ueq(min) Range 4.1 Ratio  
PLAT234\_ALERT\_4\_C Large Hirshfeld Difference S12 --N13 . 0.17 Ang.  
PLAT241\_ALERT\_2\_C High 'MainMol' Ueq as Compared to Neighbors of C55 Check  
PLAT242\_ALERT\_2\_C Low 'MainMol' Ueq as Compared to Neighbors of C61 Check  
PLAT242\_ALERT\_2\_C Low 'MainMol' Ueq as Compared to Neighbors of C116 Check  
PLAT243\_ALERT\_4\_C High 'Solvent' Ueq as Compared to Neighbors of C34S Check  
PLAT243\_ALERT\_4\_C High 'Solvent' Ueq as Compared to Neighbors of C11S Check  
PLAT243\_ALERT\_4\_C High 'Solvent' Ueq as Compared to Neighbors of C13S Check  
PLAT243\_ALERT\_4\_C High 'Solvent' Ueq as Compared to Neighbors of C14S Check  
PLAT243\_ALERT\_4\_C High 'Solvent' Ueq as Compared to Neighbors of C21S Check  
PLAT243\_ALERT\_4\_C High 'Solvent' Ueq as Compared to Neighbors of C23S Check  
PLAT243\_ALERT\_4\_C High 'Solvent' Ueq as Compared to Neighbors of C25S Check  
PLAT244\_ALERT\_4\_C Low 'Solvent' Ueq as Compared to Neighbors of C31S Check  
PLAT244\_ALERT\_4\_C Low 'Solvent' Ueq as Compared to Neighbors of C32S Check  
PLAT244\_ALERT\_4\_C Low 'Solvent' Ueq as Compared to Neighbors of C35S Check  
PLAT244\_ALERT\_4\_C Low 'Solvent' Ueq as Compared to Neighbors of C12S Check  
PLAT244\_ALERT\_4\_C Low 'Solvent' Ueq as Compared to Neighbors of C16S Check  
PLAT244\_ALERT\_4\_C Low 'Solvent' Ueq as Compared to Neighbors of C22S Check  
PLAT244\_ALERT\_4\_C Low 'Solvent' Ueq as Compared to Neighbors of C26S Check  
PLAT331\_ALERT\_2\_C Small Aver Phenyl C-C Dist C21 --C26 . 1.36 Ang.  
PLAT331\_ALERT\_2\_C Small Aver Phenyl C-C Dist C31 --C36 . 1.37 Ang.  
PLAT362\_ALERT\_2\_C Short C(sp3)-C(sp2) Bond C21S - C27S . 1.37 Ang.  
PLAT411\_ALERT\_2\_C Short Inter H...H Contact H22 ..H23S . 2.08 Ang.  
1/2+x,3/2-y,z = 3\_565 Check  
PLAT906\_ALERT\_3\_C Large K Value in the Analysis of Variance ..... 3.841 Check  
PLAT911\_ALERT\_3\_C Missing FCF Refl Between Thmin & STh/L= 0.582 26 Report

---

**Alert level G**

PLAT002\_ALERT\_2\_G Number of Distance or Angle Restraints on AtSite 17 Note  
PLAT003\_ALERT\_2\_G Number of Uiso or Uij Restrained non-H Atoms ... 75 Report  
PLAT007\_ALERT\_5\_G Number of Unrefined Donor-H Atoms ..... 2 Report  
PLAT172\_ALERT\_4\_G The CIF-Embedded .res File Contains DFIX Records 2 Report  
PLAT174\_ALERT\_4\_G The CIF-Embedded .res File Contains FLAT Records 2 Report  
PLAT176\_ALERT\_4\_G The CIF-Embedded .res File Contains SADI Records 4 Report  
PLAT186\_ALERT\_4\_G The CIF-Embedded .res File Contains ISOR Records 4 Report  
PLAT187\_ALERT\_4\_G The CIF-Embedded .res File Contains RIGU Records 12 Report  
PLAT232\_ALERT\_2\_G Hirshfeld Test Diff (M-X) Cu1 --Cl2 . 7.0 s.u.  
PLAT302\_ALERT\_4\_G Anion/Solvent/Minor-Residue Disorder (Resd 2 ) 14% Note

```

PLAT432_ALERT_2_G Short Inter X...Y Contact C16S ..C38S 3.07 Ang.
3/2-x,-1/2+y,1/2+z = 4_645 Check
PLAT860_ALERT_3_G Number of Least-Squares Restraints ..... 612 Note
PLAT870_ALERT_4_G ALERTS Related to Twinning Effects Suppressed .. ! Info
PLAT883_ALERT_1_G No Info/Value for _atom_sites_solution_primary . Please Do !
PLAT910_ALERT_3_G Missing # of FCF Reflection(s) Below Theta(Min). 2 Note
PLAT933_ALERT_2_G Number of OMIT Records in Embedded .res File ... 5 Note
PLAT941_ALERT_3_G Average HKL Measurement Multiplicity ..... 1.7 Low
PLAT961_ALERT_5_G Dataset Contains no Negative Intensities ..... Please Check

```

---

```

0 ALERT level A = Most likely a serious problem - resolve or explain
1 ALERT level B = A potentially serious problem, consider carefully
33 ALERT level C = Check. Ensure it is not caused by an omission or oversight
18 ALERT level G = General information/check it is not something unexpected

1 ALERT type 1 CIF construction/syntax error, inconsistent or missing data
17 ALERT type 2 Indicator that the structure model may be wrong or deficient
9 ALERT type 3 Indicator that the structure quality may be low
23 ALERT type 4 Improvement, methodology, query or suggestion
2 ALERT type 5 Informative message, check

```

---

It is advisable to attempt to resolve as many as possible of the alerts in all categories. Often the minor alerts point to easily fixed oversights, errors and omissions in your CIF or refinement strategy, so attention to these fine details can be worthwhile. In order to resolve some of the more serious problems it may be necessary to carry out additional measurements or structure refinements. However, the purpose of your study may justify the reported deviations and the more serious of these should normally be commented upon in the discussion or experimental section of a paper or in the "special\_details" fields of the CIF. checkCIF was carefully designed to identify outliers and unusual parameters, but every test has its limitations and alerts that are not important in a particular case may appear. Conversely, the absence of alerts does not guarantee there are no aspects of the results needing attention. It is up to the individual to critically assess their own results and, if necessary, seek expert advice.

### Publication of your CIF in IUCr journals

A basic structural check has been run on your CIF. These basic checks will be run on all CIFs submitted for publication in IUCr journals (*Acta Crystallographica*, *Journal of Applied Crystallography*, *Journal of Synchrotron Radiation*); however, if you intend to submit to *Acta Crystallographica Section C* or *E* or *IUCrData*, you should make sure that full publication checks are run on the final version of your CIF prior to submission.

### Publication of your CIF in other journals

Please refer to the *Notes for Authors* of the relevant journal for any special instructions relating to CIF submission.

---

**PLATON version of 05/12/2020; check.def file version of 05/12/2020**

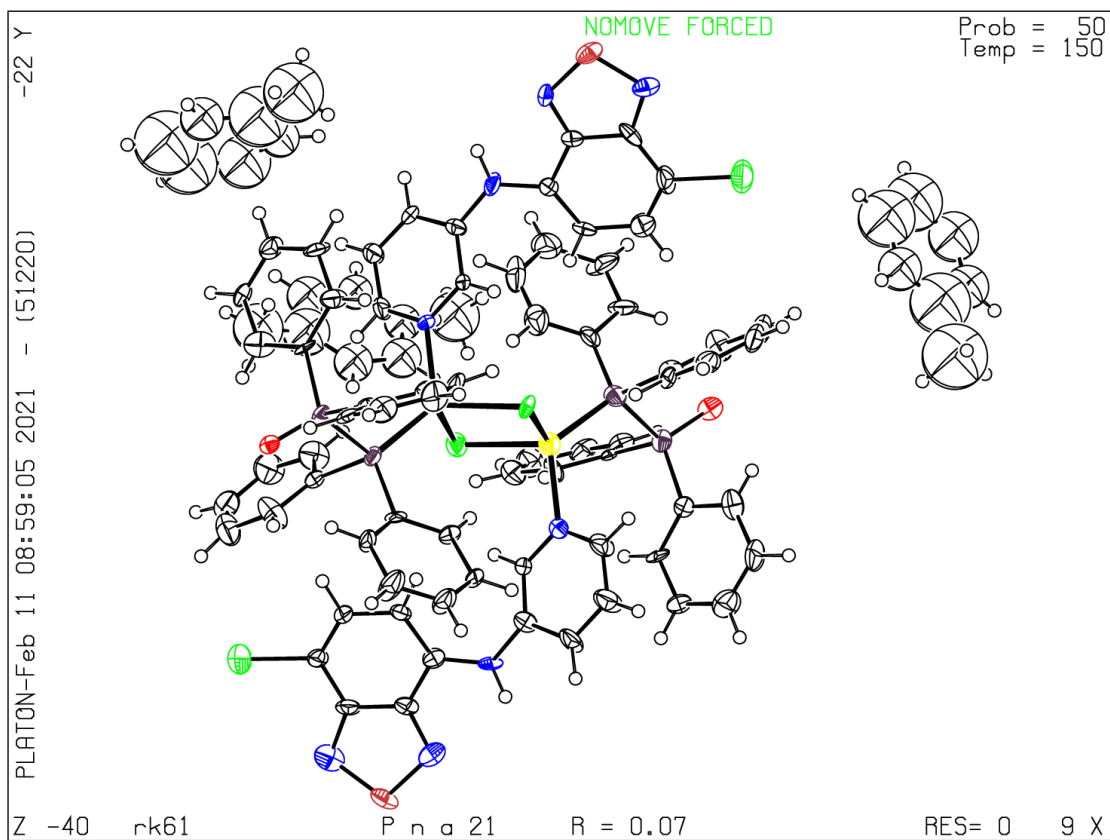

Supplement: s1 [file s1]
