# Supplementary material for: Unexpectedly Long Lifetime of the Excited State of Benzothiadiazole Derivative and Its Adducts with Lewis Acids
Source: MDPI journal article supplement (doi:10.3390/molecules26072030), 2021-04-02
Supplement: s1 [file s1]

## Supporting Information

### Unexpectedly long lifetime of the excited state of benzothiadiazole derivative and its adducts with Lewis acids

by

Radmir M. Khisamov, Taisiya S. Sukhikh, Sergey N. Konchenko

**Table S1. Crystal data and structure refinement for the compounds.**

| Identification code                         | <b>2</b>                                                                                         | <b>3·2C<sub>7</sub>H<sub>8</sub></b>                                                                                                        |
|---------------------------------------------|--------------------------------------------------------------------------------------------------|---------------------------------------------------------------------------------------------------------------------------------------------|
| Empirical formula                           | C <sub>22</sub> H <sub>16</sub> Br <sub>2</sub> Cl <sub>4</sub> N <sub>8</sub> S <sub>2</sub> Zn | C <sub>91</sub> H <sub>78</sub> Br <sub>2</sub> Cl <sub>2</sub> Cu <sub>2</sub> N <sub>8</sub> O <sub>2</sub> P <sub>4</sub> S <sub>2</sub> |
| Formula weight                              | 823.54                                                                                           | 1861.41                                                                                                                                     |
| Temperature/K                               | 150(2)                                                                                           | 150(2)                                                                                                                                      |
| Crystal system                              | monoclinic                                                                                       | orthorhombic                                                                                                                                |
| Space group                                 | <i>P</i> 2 <sub>1</sub> / <i>c</i>                                                               | <i>Pna</i> 2 <sub>1</sub>                                                                                                                   |
| a/Å                                         | 11.5203(9)                                                                                       | 19.7043(12)                                                                                                                                 |
| b/Å                                         | 18.2029(16)                                                                                      | 18.9722(12)                                                                                                                                 |
| c/Å                                         | 13.1842(12)                                                                                      | 22.2962(17)                                                                                                                                 |
| β/°                                         | 93.957(3)                                                                                        | 90                                                                                                                                          |
| Volume/Å <sup>3</sup>                       | 2758.2(4)                                                                                        | 8335.1(10)                                                                                                                                  |
| Z                                           | 4                                                                                                | 4                                                                                                                                           |
| ρ <sub>calc</sub> /cm <sup>3</sup>          | 1.983                                                                                            | 1.483                                                                                                                                       |
| μ/mm <sup>-1</sup>                          | 4.359                                                                                            | 1.715                                                                                                                                       |
| F(000)                                      | 1616.0                                                                                           | 3800.0                                                                                                                                      |
| Crystal size/mm <sup>3</sup>                | 0.15 × 0.1 × 0.05                                                                                | 0.23 × 0.15 × 0.14                                                                                                                          |
| Radiation                                   | MoKα (λ = 0.71073)                                                                               | MoKα (λ = 0.71073)                                                                                                                          |
| 2Θ range for data collection/°              | 3.544 to 48.874                                                                                  | 3.496 to 48.876                                                                                                                             |
| Reflections collected                       | 25850                                                                                            | 11798                                                                                                                                       |
| Independent reflections                     | 4555 [R <sub>int</sub> = 0.0908, R <sub>sigma</sub> = 0.0790]                                    | 11798 [R <sub>int</sub> = 0.089, R <sub>sigma</sub> = 0.3417]                                                                               |
| Data/restraints/parameters                  | 4555/8/358                                                                                       | 11798/612/883                                                                                                                               |
| Goodness-of-fit on F <sup>2</sup>           | 1.014                                                                                            | 0.910                                                                                                                                       |
| Final R indexes [I ≥ 2σ (I)]                | R <sub>1</sub> = 0.0478, wR <sub>2</sub> = 0.1044                                                | R <sub>1</sub> = 0.0716, wR <sub>2</sub> = 0.1441                                                                                           |
| Final R indexes [all data]                  | R <sub>1</sub> = 0.0833, wR <sub>2</sub> = 0.1176                                                | R <sub>1</sub> = 0.1144, wR <sub>2</sub> = 0.1520                                                                                           |
| Largest diff. peak/hole / e Å <sup>-3</sup> | 1.45/-0.91                                                                                       | 1.36/-0.76                                                                                                                                  |
| Flack parameter                             |                                                                                                  | 0.43(2)                                                                                                                                     |
